# Supplementary material for: A combined reference panel from the 1000 Genomes and UK10K projects improved rare variant imputation in European and Chinese samples
Source: PubMed Central journal article supplement (PMC5177868; doi:10.1038/srep39313), 2016-12-22

# Supplementary Information

## A combined reference panel from the 1000 Genomes and UK10K projects improved rare variant imputation in European and Chinese samples

Wen-Chi Chou<sup>1,6,\*</sup>, Hou-Feng Zheng<sup>2,\*</sup>, Chia-Ho Cheng<sup>1</sup>, Han Yan<sup>3</sup>, Li Wang<sup>2</sup>, Fang Han<sup>3</sup>, J. Brent Richards<sup>4,5</sup>, David Karasik<sup>1</sup>, Douglas P. Kiel<sup>1,6</sup>, Yi-Hsiang Hsu<sup>1,6,7</sup>

<sup>1</sup>Institute for Aging Research, Hebrew SeniorLife, Department of Medicine, Beth Israel Deaconess Medical Center and Harvard Medical School, Boston, MA

<sup>2</sup>Institute of Aging Research, School of Medicine, Hangzhou Normal University, and the Affiliated Hospital of Hangzhou Normal University, Hangzhou, Zhejiang, China

<sup>3</sup>Department of Pulmonary, Critical Care Medicine, Peking University People's Hospital, Beijing, China

<sup>4</sup>Department of Medicine, Human Genetics, Epidemiology and Biostatistics, Lady Davis Institute for Medical Research, Jewish General Hospital, McGill University, Montreal, Quebec, Canada

<sup>5</sup>Twin Research and Genetic Epidemiology, King's College London, London, United Kingdom

<sup>6</sup>Broad Institute of MIT and Harvard, Cambridge, MA

<sup>7</sup>Molecular and Integrative Physiological Sciences, Harvard School of Public Health, Boston, MA

\*These authors contributed equally to this work.

Correspondence and requests for materials should be addressed to Y.-H.H. (email: YiHsiangHsu@hsl.harvard.edu)

**Supplementary Table S1. Three reference panels used in this study.**

| <b>Reference panel</b>                   | <b>Number of individuals</b> | <b>Ancestry</b>                                                  | <b>Number of variants</b>            |
|------------------------------------------|------------------------------|------------------------------------------------------------------|--------------------------------------|
| <b>1000G</b>                             | 1,092                        | European, African, AdMixed American, East Asian, and South Asian | 30,061,896<br>(~12,605,541 European) |
| <b>UK10K</b>                             | 2,432                        | Europe                                                           | 21,513,377                           |
| <b>Combined panel of 1000G and UK10K</b> | 3,524                        | Combined populations from 1000G and UK10K                        | 39,036,197                           |

**Supplementary Table S2. Three genotype data sets used for imputation in this study.**

| <b>Cohort</b>                           | <b>Number of individuals</b> | <b>Ancestry</b>                  | <b>Number of variants</b>                   |
|-----------------------------------------|------------------------------|----------------------------------|---------------------------------------------|
| <b>Framingham Heart Study - Affy550</b> | 8,477                        | European descent                 | 550K SNPs (Affymetrix 500k + MIPS 50k)      |
| <b>Framingham Heart Study - Omni5</b>   | 2,474                        | European descent                 | 3,480K SNPs (HumanOmni5M-4v1 array (OMNI5)) |
| <b>North Chinese Study</b>              | 3,042                        | Mostly East Asian of Han descent | 657K SNPs (Affymetrix Axiom CHB 1 array)    |

**Supplementary Table S3. Imputation quality with rare measured genotypes excluded.** The imputation quality of FHS data (chromosome 20) was evaluated by median squared correlation between actual allelic dosages and imputed allelic dosages from imputations with the 1000G and 1000G+UK10K reference panels. The MAFs were estimated from imputation with 1000G+UK10K reference panel.

| Measured genotypes excluding MAF < 2% | Reference panel | MAF     |           |        |       |
|---------------------------------------|-----------------|---------|-----------|--------|-------|
|                                       |                 | 0-0.01% | 0.01-0.5% | 0.5-1% | 1-2%  |
| No                                    | 1000G           | 0       | 0.154     | 0.237  | 0.384 |
| No                                    | 1000G+UK10K     | 0       | 0.307     | 0.485  | 0.574 |
| Yes                                   | 1000G           | 0.005   | 0.155     | 0.272  | 0.398 |
| Yes                                   | 1000G+UK10K     | 0       | 0.291     | 0.481  | 0.569 |

**Supplementary Table S4. Imputation quality with additional adjustment for family structure using duoHMM process.** The imputation quality of FHS data (chromosome 20) was evaluated by median squared correlation between actual allelic dosages and imputed allelic dosages from imputations with 1000G and 1000G+UK10K. The MAFs were estimated from imputation with the 1000G+UK10K reference panel.

|                                                          |                        | <b>MAF</b> |           |        |       |
|----------------------------------------------------------|------------------------|------------|-----------|--------|-------|
| <b>duoHMM used to take into account family relations</b> | <b>Reference panel</b> | 0-0.01%    | 0.01-0.5% | 0.5-1% | 1-2%  |
| No                                                       | 1000G                  | 0          | 0.154     | 0.237  | 0.384 |
| No                                                       | 1000G+UK10K            | 0          | 0.307     | 0.485  | 0.574 |
| Yes                                                      | 1000G                  | 0.193      | 0.221     | 0.314  | 0.442 |
| Yes                                                      | 1000G+UK10K            | 0          | 0.390     | 0.551  | 0.636 |

**Fig S1. Imputation quality of FHS data.** The quality was evaluated by squared correlation between actual allelic dosages and imputed allelic dosages from imputations with the 1000G and 1000G+UK10K reference panels. Each small boxplot shows  $r^2$  on the y-axis in range of MAF show at the top of the small boxplot. The red diamond indicates the average  $r^2$ .

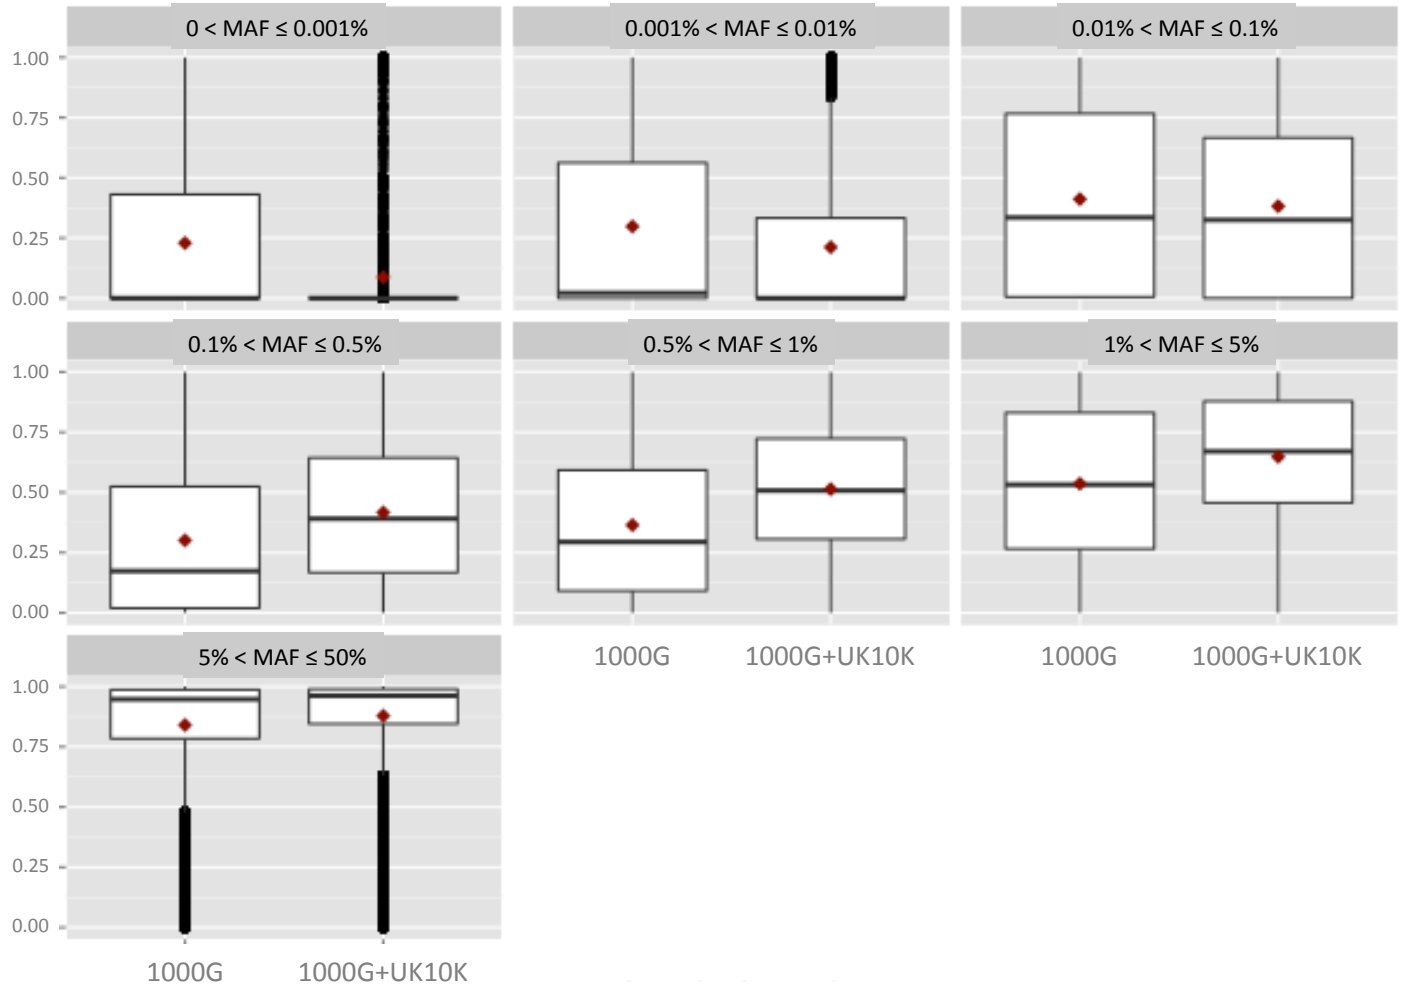

**Figure S2. The PCA result of all samples including 1000G, UK10K, FHS, and NCS.** X-axis denotes the value of PC1, and y-axis denotes the value of PC2, with each dot representing one individual. The shape and color for individuals from 1000G African, 1000G American, 1000G European, 1000G Asian, UK10K, FHS, and NCS are black circle, red circle, blue circle, green circle, purple square, gray diamond, and cyan triangle.

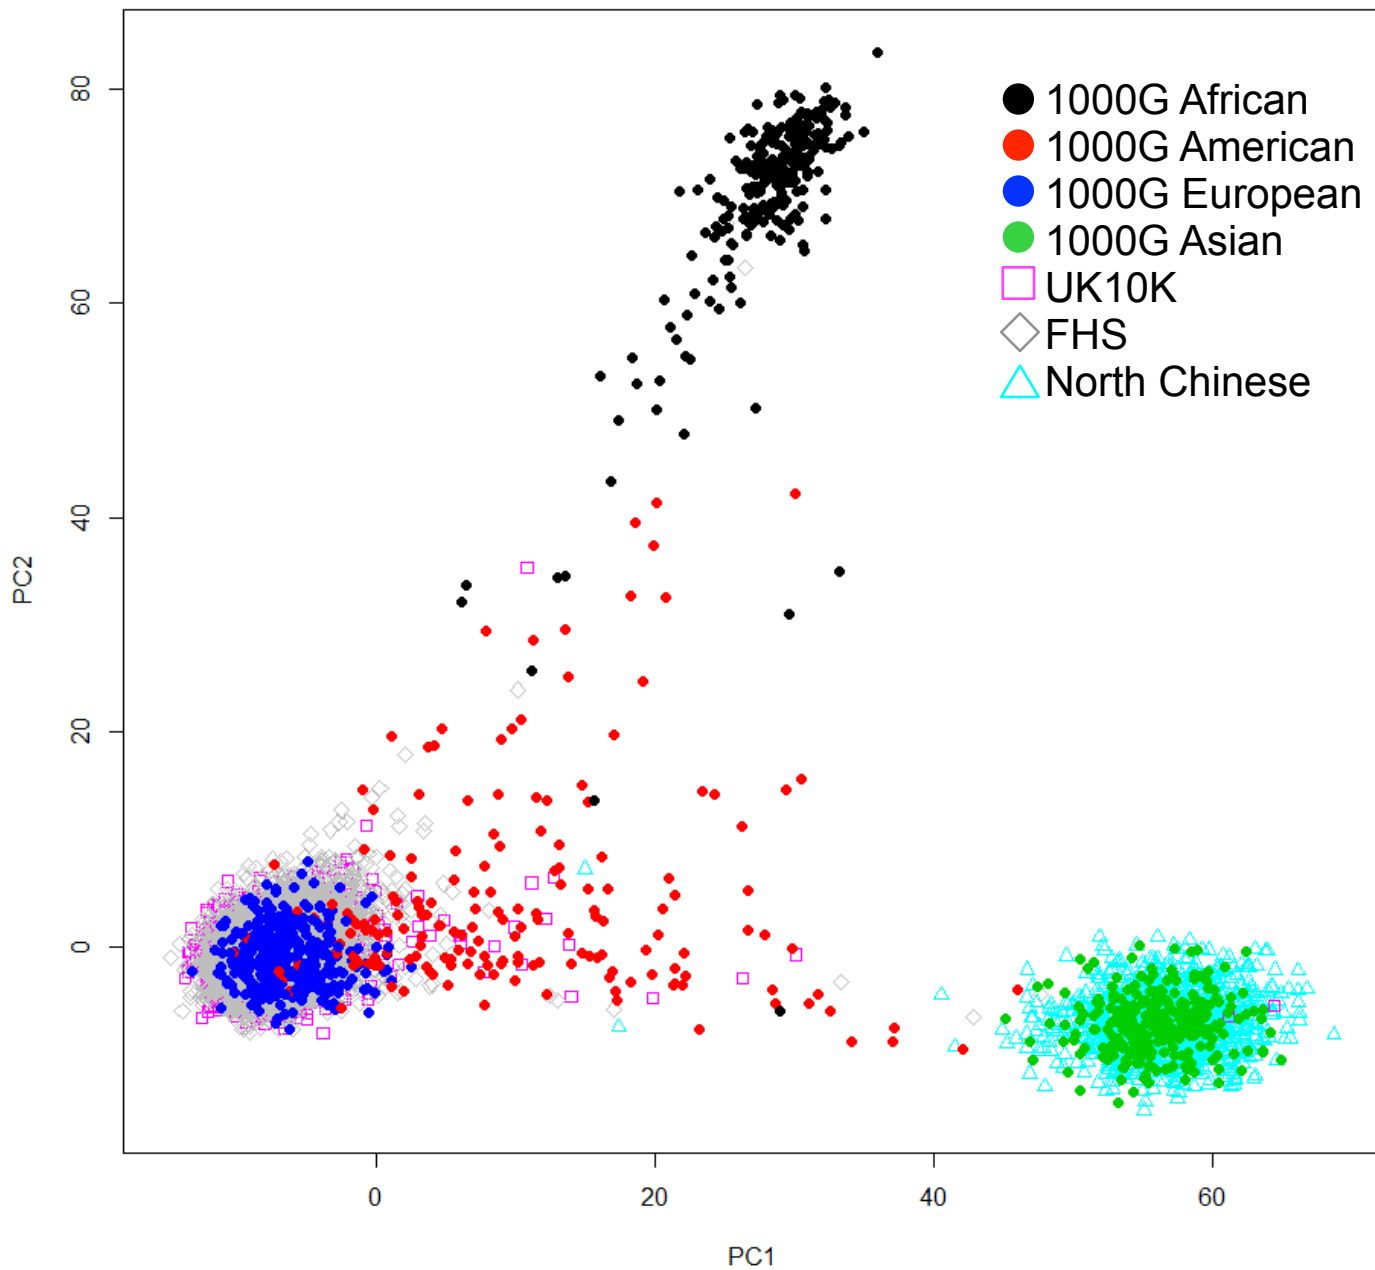

Supplement: srep39313-s1.pdf [file srep39313-s1.pdf]
